# Supplementary material
Source: publisher site journal article supplement (https://www.spandidos-publications.com/4986/downloadSupplementary)
Supplement: Supplementary file 1 [file downloadSupplementary]

**Table SI.** Impact of thoracic multidisciplinary Tumor Boards on management of patients with cancer  
(Form filled based on data available before tumor board)

|                        |                    |                                                                                                             |                       |  |               |             |        |  |
|------------------------|--------------------|-------------------------------------------------------------------------------------------------------------|-----------------------|--|---------------|-------------|--------|--|
| <b>Patient code</b>    |                    |                                                                                                             | <b>Physician code</b> |  |               | <b>Date</b> |        |  |
| Brief History          |                    |                                                                                                             |                       |  |               |             |        |  |
| Physical findings      |                    |                                                                                                             |                       |  |               |             |        |  |
| Pertinent Lab findings | CBC                |                                                                                                             | LFTs                  |  | Tumor Markers |             | Others |  |
|                        | WBC                |                                                                                                             |                       |  | CA19-9        |             |        |  |
|                        | Hb                 |                                                                                                             | AST/SGOT              |  | CA-125        |             |        |  |
|                        | Hct                |                                                                                                             | ALT/SGPT              |  | CA15-3        |             |        |  |
|                        | PMN                |                                                                                                             | Bili T/D              |  | CEA           |             |        |  |
|                        | Lymphocytes        |                                                                                                             | AP                    |  | $\alpha$ -FP  |             |        |  |
|                        | Platelets          |                                                                                                             | $\gamma$ GT           |  | PSA           |             |        |  |
| Radiological Findings  | X-rays             | Date                                                                                                        |                       |  |               |             |        |  |
|                        | CT Scans           |                                                                                                             |                       |  |               |             |        |  |
|                        | Bone scan          |                                                                                                             |                       |  |               |             |        |  |
|                        | MRI                |                                                                                                             |                       |  |               |             |        |  |
|                        | PET                |                                                                                                             |                       |  |               |             |        |  |
|                        | other              |                                                                                                             |                       |  |               |             |        |  |
| Pathology              | Biopsy             |                                                                                                             |                       |  |               |             |        |  |
|                        | Surgical pathology |                                                                                                             |                       |  |               |             |        |  |
|                        | IHC                |                                                                                                             |                       |  |               |             |        |  |
| Diagnosis              |                    |                                                                                                             |                       |  |               |             |        |  |
| Stage (TNM)            |                    |                                                                                                             |                       |  |               |             |        |  |
| Plan of treatment      |                    | <input type="checkbox"/> Yes <input type="checkbox"/> Pending tumor board decision<br>Indicate plan if yes: |                       |  |               |             |        |  |

(Form filled based on data available after Tumor Board)

|                                        |                       |                |      |
|----------------------------------------|-----------------------|----------------|------|
| Patient code                           |                       | Physician code | Date |
| History and PE (new elements - if any) |                       |                |      |
| Radiological Findings                  | X-rays                |                |      |
|                                        | CT scans              |                |      |
|                                        | Bone scan             |                |      |
|                                        | MRI                   |                |      |
|                                        | PET                   |                |      |
|                                        | Other                 |                |      |
| Pathology                              | Biopsy                |                |      |
|                                        | Surgical Pathology    |                |      |
|                                        | IHC                   |                |      |
| Diagnosis                              |                       |                |      |
| Stage (TNM)                            |                       |                |      |
| Tumor Board Recommendations            | Surgery               |                |      |
|                                        | Radiotherapy          |                |      |
|                                        | Chemotherapy          |                |      |
|                                        | Targeted Chemotherapy |                |      |
|                                        | Hormonal Therapy      |                |      |

**Table SII.** Impact of thoracic multidisciplinary Tumor Boards on management of patients with cancer.  
(Case discussion evaluation)

| Change                | Yes | No |
|-----------------------|-----|----|
| Type of surgery       |     |    |
| Radiotherapy          |     |    |
| Chemotherapy          |     |    |
| Targeted chemotherapy |     |    |
| Hormonal therapy      |     |    |

|                                       |                                                  |                                                         |                               |
|---------------------------------------|--------------------------------------------------|---------------------------------------------------------|-------------------------------|
| Documentation of Tumor Board findings |                                                  |                                                         |                               |
| <input type="checkbox"/> Office visit | <input type="checkbox"/> Inpatient progress note | <input type="checkbox"/> Tumor Board Documentation note | <input type="checkbox"/> None |

|                                   |                                        |
|-----------------------------------|----------------------------------------|
| Implementation of recommendations |                                        |
| <input type="checkbox"/> Yes      | <input type="checkbox"/> No<br>Reason: |
